# Supplementary material
Source: PubMed Central journal article supplement (PMC6152445)
Supplement: kmab-10-06-1476815-s001.pdf [file kmab-10-06-1476815-s001.pdf]

## Supplementary Figure 1.

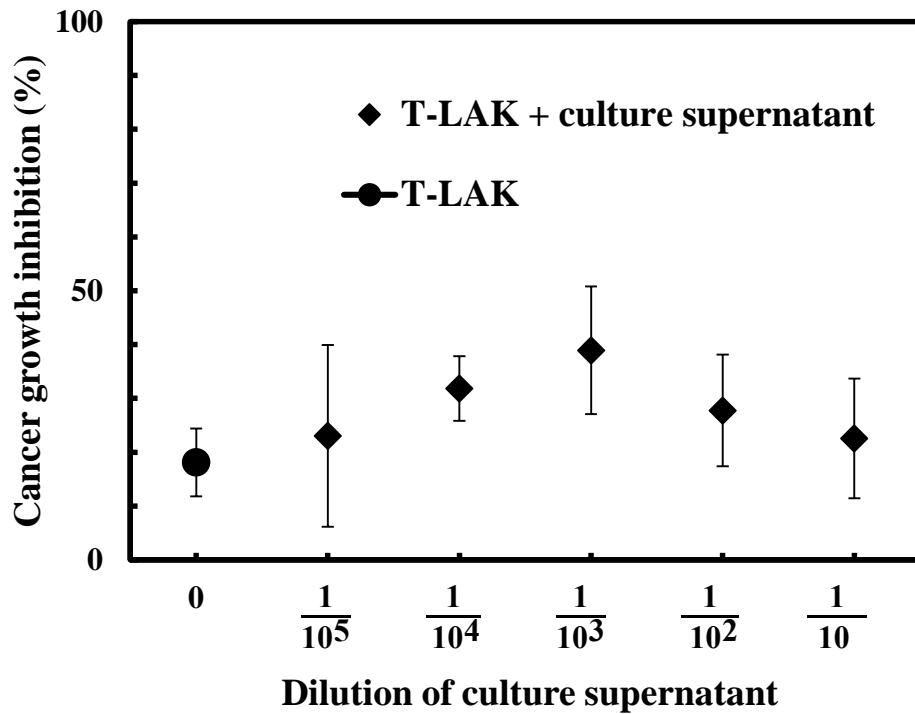

Effects of impurities from *Brevibacillus choshinensis* on growth inhibition effects against epidermal growth factor receptor (EGFR)-positive TFK-1 were evaluated using 3-(4,5-dimethylthiazole-2-yl)-5-(3-carboxymethoxyphenyl)-2-(4-sulfophenyl)-2H-tetrazolium (MTS) assay. Diluted culture supernatants of *B. choshinensis* and T-LAK cells were added to TFK-1 cells (T-LAK:TFK-1 ratio, 5:1)

# Supplementary Figure 2.

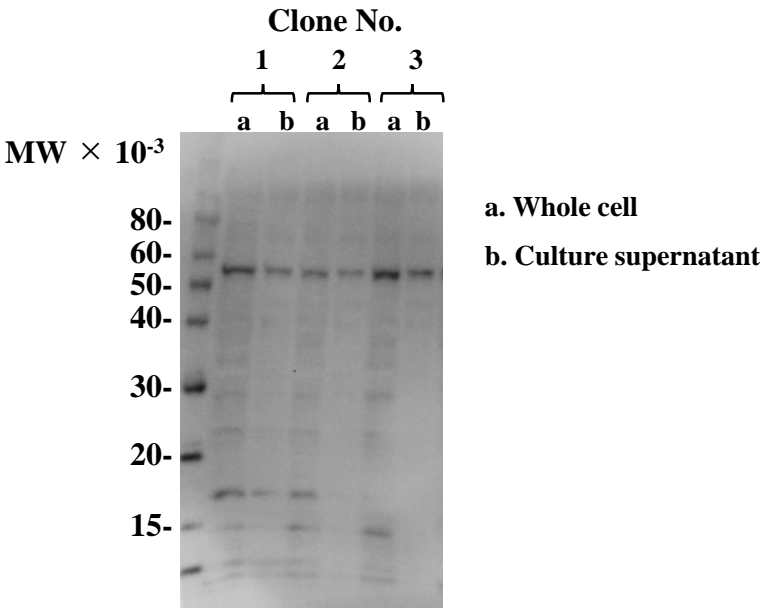

Western blotting analysis of three different clones of ta6 expressing *Brevibacillus choshinensis* using horseradish peroxidase (HRP)-conjugated anti-His tag antibody
